# Supplementary material
Source: publisher figshare collection journal article supplement (https://acs.figshare.com/ndownloader/files/25179282)
Supplement: Supplementary file 1 [file 25179282]

## **Supporting Information**

### **Covalently-Linked Hexagonal Boron Nitride-Graphene Oxide Nanocomposites as High-Performance Oil-Dispersible Lubricant Additives**

*Suprakash Samanta,<sup>ab</sup>Rashmi. R. Sahoo<sup>ab\*</sup>*

<sup>a</sup>Environmental Engineering Division,

CSIR - Central Mechanical Engineering Research Institute, Durgapur- 713209, India

<sup>b</sup>Academy of Scientific and Innovative Research (AcSIR), Ghaziabad - 201002, India

**\*Corresponding Author**

E-Mail: rr\_sahoo@cmeri.res.in

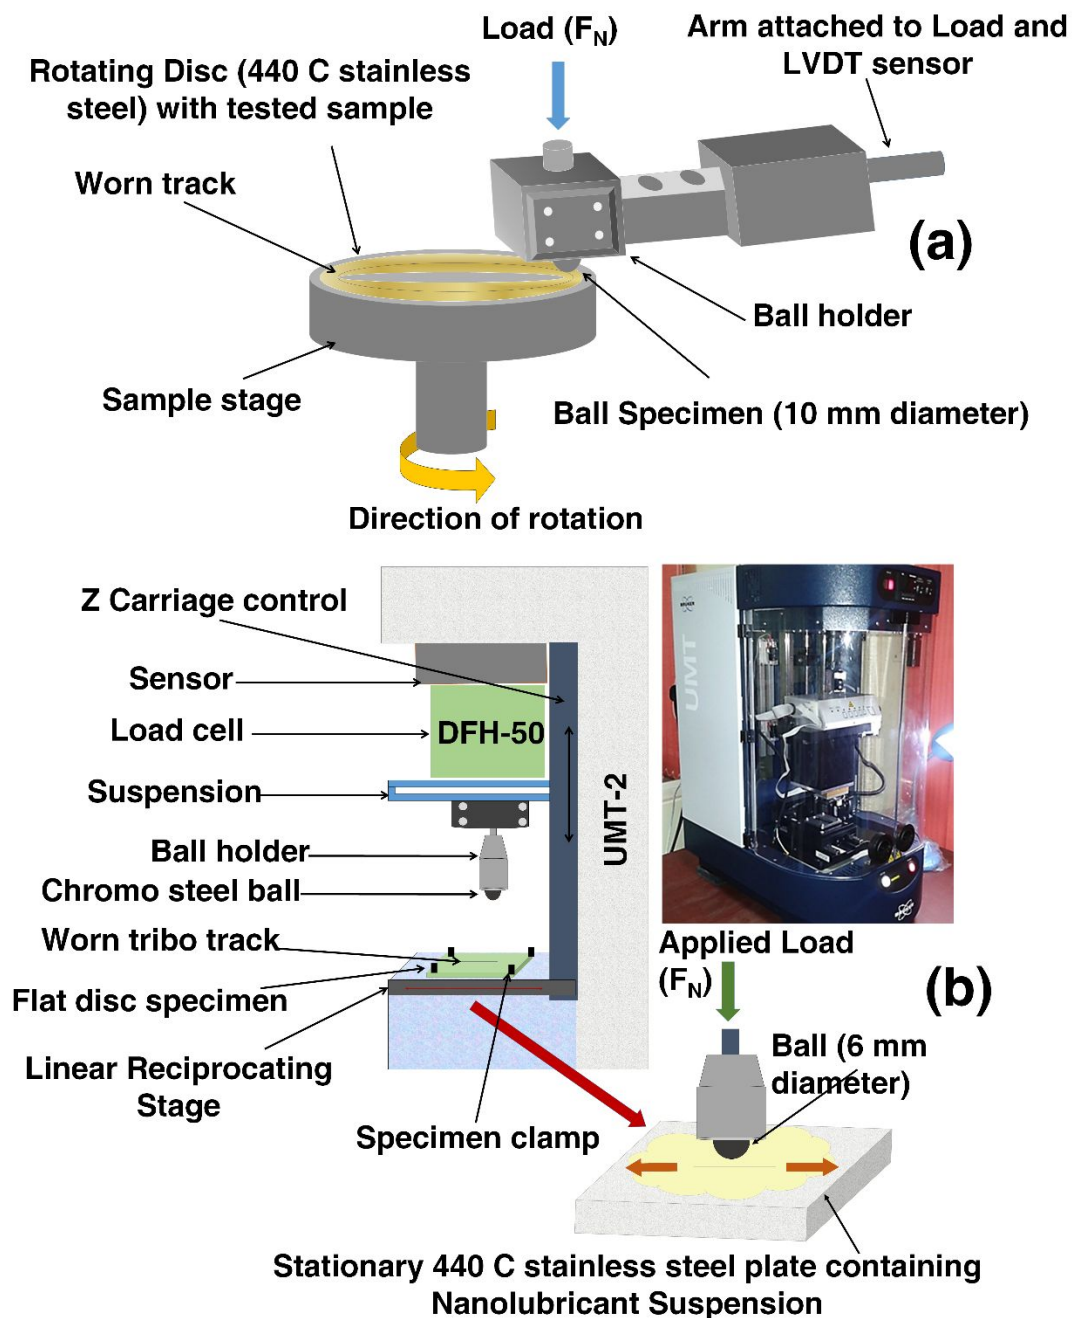

**Fig S1:** (a) Schematic illustration for macrotribological experimental set up, (b) Schematic and photographic representations for microtribological experimental set up during rotating/reciprocating sliding with h-BN and its functionalized parts as lubricant additives.

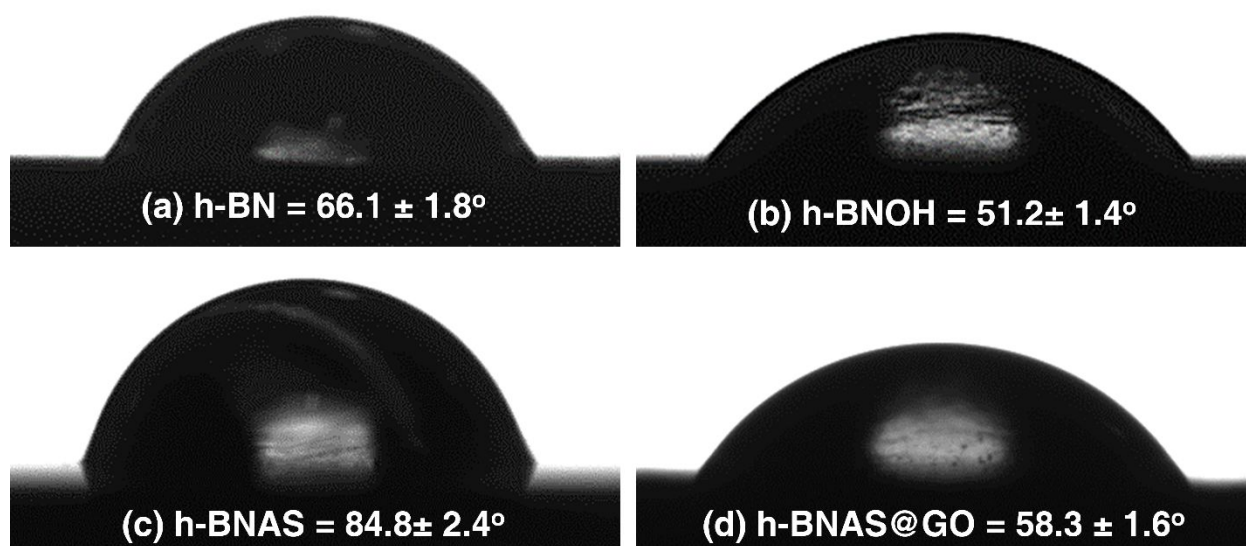

**Fig S2:** Water contact angle measurements on (a) h-BN, (b) h-BNOH, (c) h-BNAS and (d) h-BNAS@GO particle pallet with corresponding contact angle values.

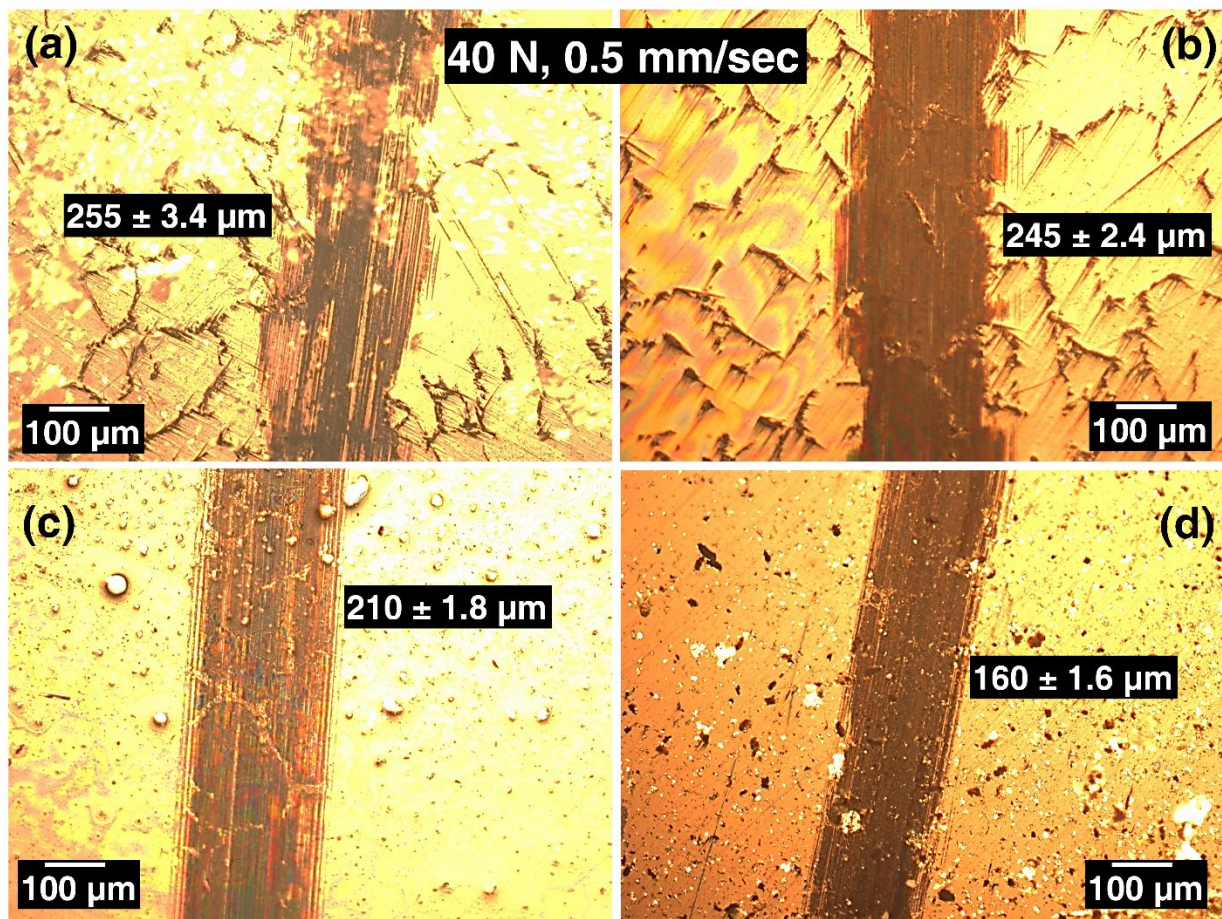

**Fig S3:** Posttribological optical microscope images and corresponding tribo track width generated with microtribological ball-on-disc experiments (40 N,  $P_m \sim 2.15$  GPa) on disc surfaces for (a) h-BN, (b) h-BN-OH, (c) h-BNAS and (d) h-BNAS@GO composite dispersed nanolubricant at HLLS conditions using sliding stroke length of 5 mm.

**Table S1:** Properties of base lubricating (heavy paraffin) oil

| Property                  | Value with units       |
|---------------------------|------------------------|
| Colour                    | Colourless             |
| Density at 20 °C          | 0.85 g/cm <sup>3</sup> |
| kinematic viscosity 40 °C | 66.0 cSt               |
| Flash point               | >210 °C                |
| Pour point                | - 15 °C                |
| Decomposition temperature | > 350 °C               |
| Ignition temperature      | > 300 °C               |
| Boiling point range       | 300 °C – 400 °C        |

**Table S2:** The condition for the macrotribological experiments.

| <b>Test conditions</b>     | <b>Parameters</b>                                                                                                    |
|----------------------------|----------------------------------------------------------------------------------------------------------------------|
| Geometry                   | Ball-on-disc (face loaded, rotating)                                                                                 |
| Type of contact            | Point                                                                                                                |
| Applied normal load        | 30 N ( $P_m = 1.4$ GPa), 50 N ( $P_m = 1.67$ GPa) and 80 N ( $P_m = 1.95$ GPa).                                      |
| Rotating sliding speed     | 0.4 m/s                                                                                                              |
| Duration of the sliding    | 60 min                                                                                                               |
| Nature of the disc samples | 440 C stainless steel [hardness (HV) = 510, elastic modules = 193 GPa, Poisson's ratio = 0.27, RMS roughness ~ 5 nm] |
| Counter parts              | 10 mm diameter chrome steel ball                                                                                     |
| Sliding condition          | Oil lubricated sliding, $T \sim 25$ °C, relative humidity ~ 32%-47%.                                                 |
| Lubricant                  | Functionalized nanoparticles suspended in heavy paraffin oil.                                                        |

**Table S3:** Microtribological experimental conditions.

| <b>Test conditions</b>            | <b>Parameters</b>                                                                                                         |
|-----------------------------------|---------------------------------------------------------------------------------------------------------------------------|
| Geometry                          | Ball-on-disc (face loaded, Precision-Positioning Slow-Reciprocating Linear Drive)                                         |
| Type of contact                   | Point                                                                                                                     |
| Applied normal load               | Low Load (LL): 10 N ( $P_m = 1.36$ GPa) and High Load (HL): 40 N ( $P_m = 2.15$ GPa).                                     |
| Stokes Length                     | 5 mm                                                                                                                      |
| Reciprocating sliding speed       | Low Speed (LS): 0.5 mm/sec) and High Speed (HS): 5 mm/sec                                                                 |
| Property of the sliding substrate | 440 C stainless steel [hardness (HV) = 510, elastic modules = 193 GPa, Poisson's ratio = 0.27, RMS roughness $\sim 5$ nm] |
| Counter parts                     | 6 mm diameter chrome steel ball                                                                                           |
| Sliding condition                 | Oil lubricated sliding, $T \sim 25$ °C, relative humidity $\sim 32\%$ -47%.                                               |
| Lubricant                         | Functionalized nanoparticles suspended in heavy paraffin oil.                                                             |

**Table S4:** Elemental wt% from EDS analysis in tribo track surfaces from microtribological ball loading tests for h-BN, h-BN-OH, h-BNAS and h-BNAS@GO composite at 40 N ( $P_m \sim 2.15$  GPa) load and LS condition.

| Lubricant particles | Element (wt%) |             |             |            |             |
|---------------------|---------------|-------------|-------------|------------|-------------|
|                     | C             | B           | O           | Si         | Fe          |
| <b>h-BN</b>         | 18.59± 1.78   | 13.25±1.12  | 6.53± 0.78  | --         | 61.63± 3.25 |
| <b>h-BNOH</b>       | 15.07± 1.23   | 12.89±1.09  | 11.78± 1.18 | --         | 60.26± 2.98 |
| <b>h-BNAS</b>       | 22.45± 2.12   | 18.49±1.86  | 5.46± 0.62  | 2.34± 0.32 | 51.26± 2.76 |
| <b>h-BNAS@GO</b>    | 33.46± 2.98   | 18.22± 2.13 | 4.56± 0.45  | 1.98± 0.23 | 41.78± 2.18 |
